# Supplementary material for: Genome-Wide Identification of Bilberry WRKY Transcription Factors: Go Wild and Duplicate
Source: MDPI journal article supplement (doi:10.3390/plants12183176), 2023-09-05

# Genome-Wide Expression of WRKY Transcription Factors in Blueberry: Go Wild and Duplicate

Winder Felipez <sup>1,2,†</sup>, Jennifer Villavicencio <sup>2,3,†</sup>, Valeria Oliveira Nizolli <sup>2</sup>, Camila Pegoraro <sup>2</sup>, Luciano da Maia <sup>2</sup> and Antonio Costa de Oliveira <sup>2,\*</sup>

**Figure S2:** Sequence Logo visualization of the identified conserved motifs in the WRKY proteins sequence using Expectation Maximization Tool for Motif Elicitation MEME.

## Motif 1

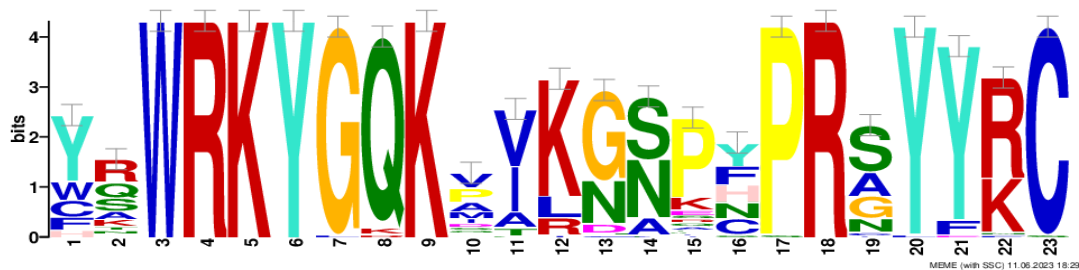

## Motif 2

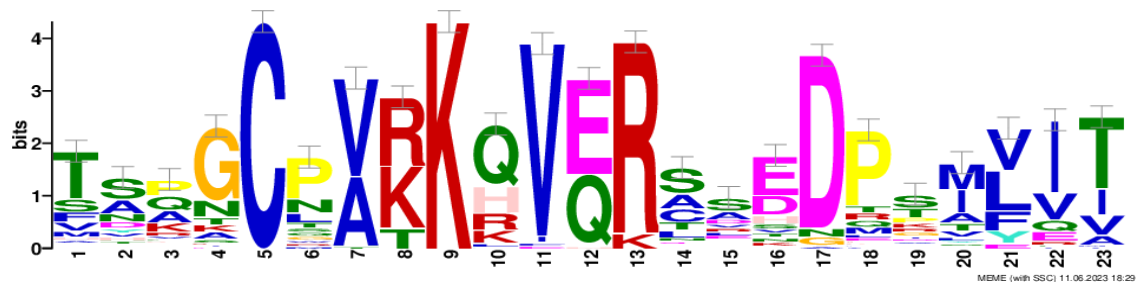

## Motif 3

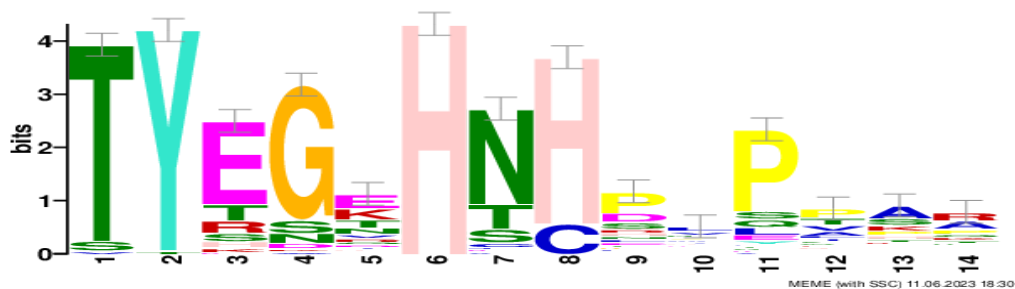

Motif 4

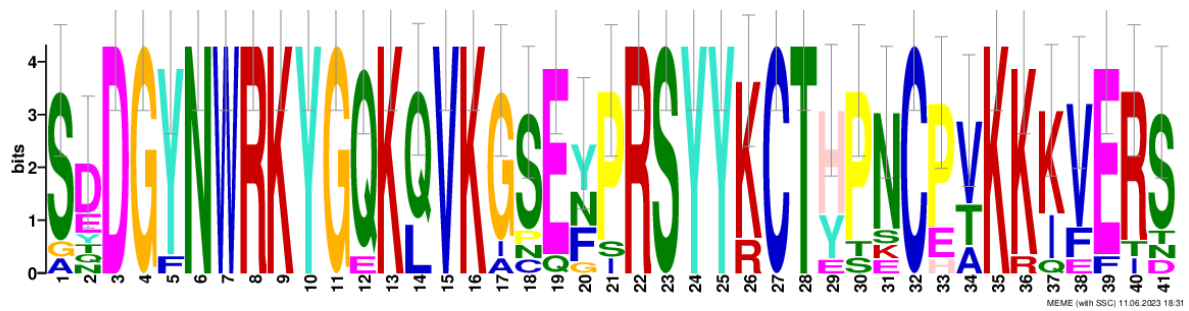

Motif 5

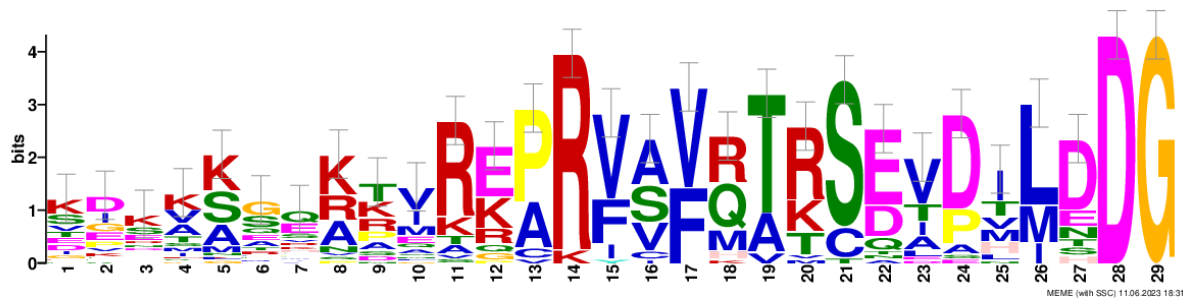

Motif 6

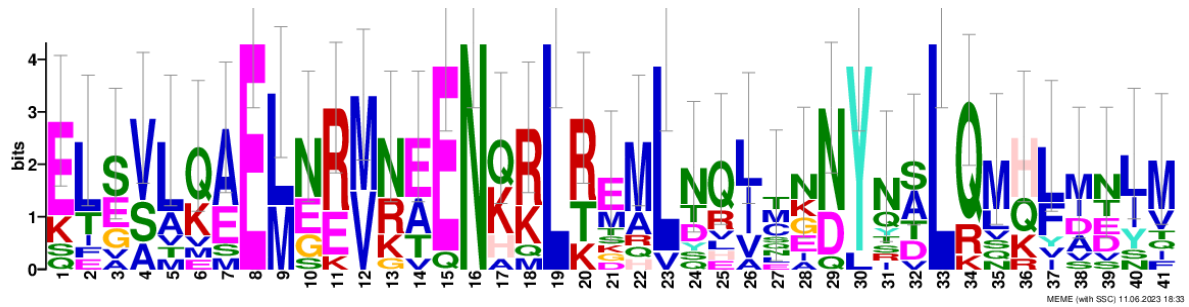

Motif 7

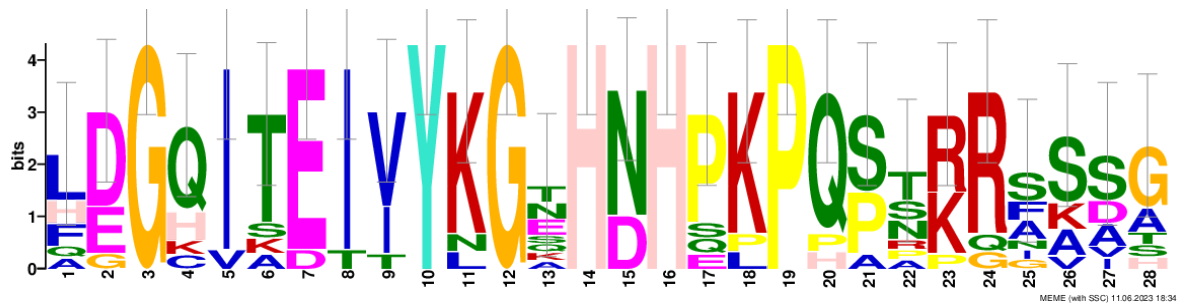

Motif 8

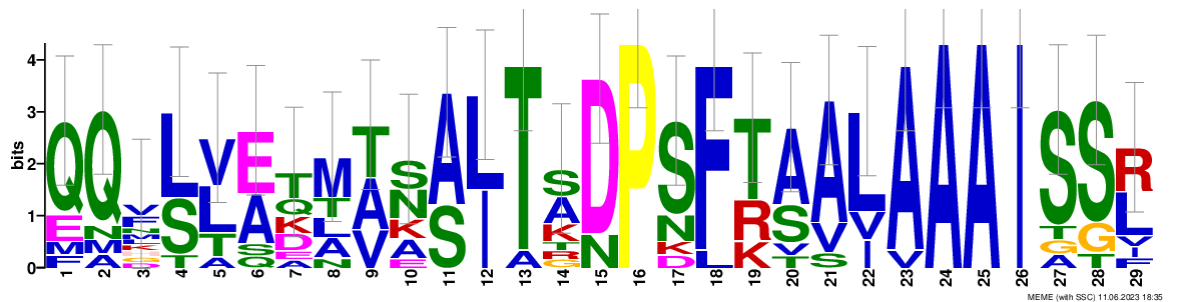

## Motif 9

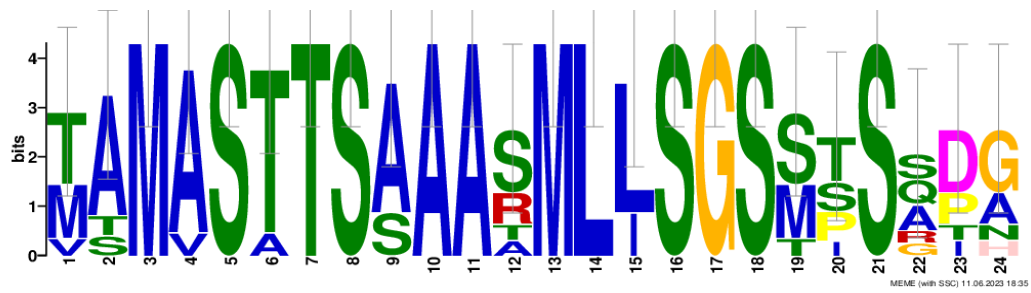

## Motif 10

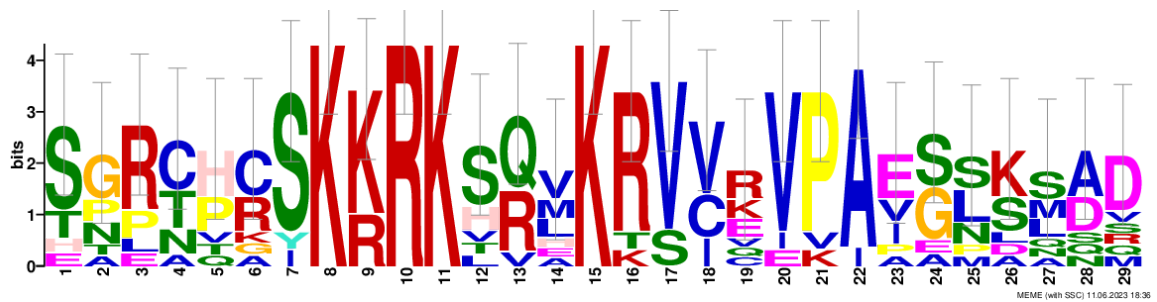

## Motif 11

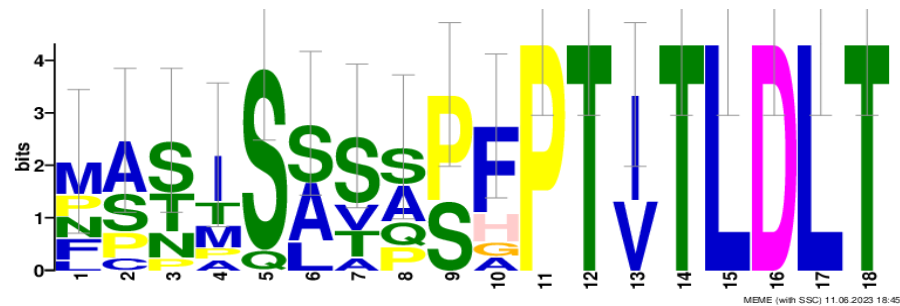

## Motif 12

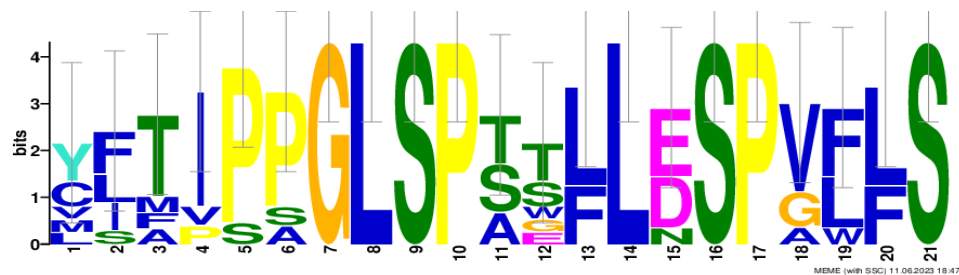

## Motif 13

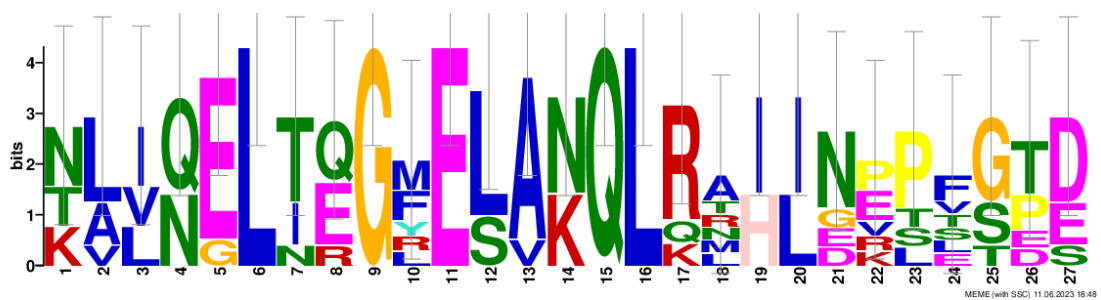

## Motif 14

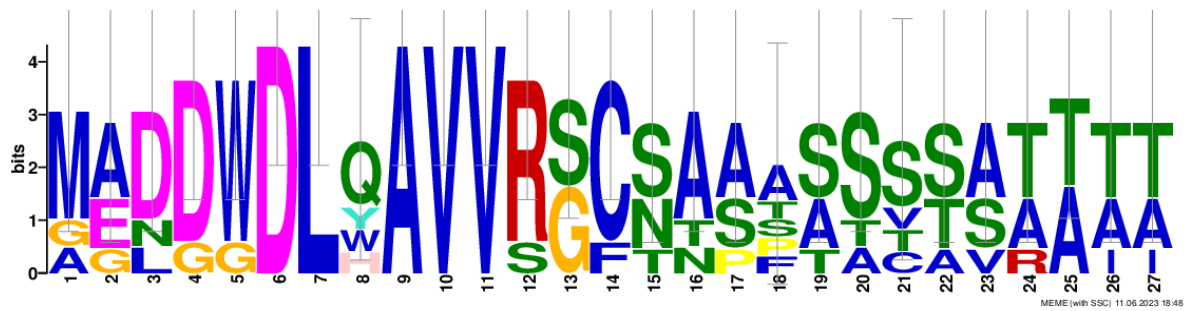

## Motif 15

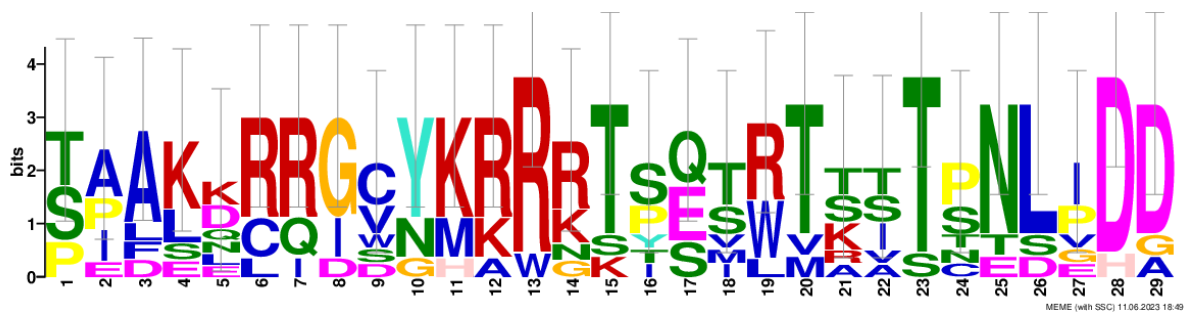

## Motif 16

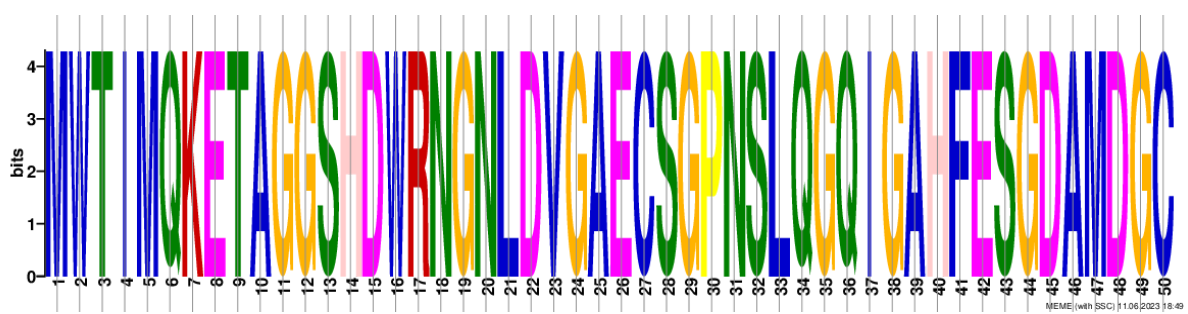

## Motif 17

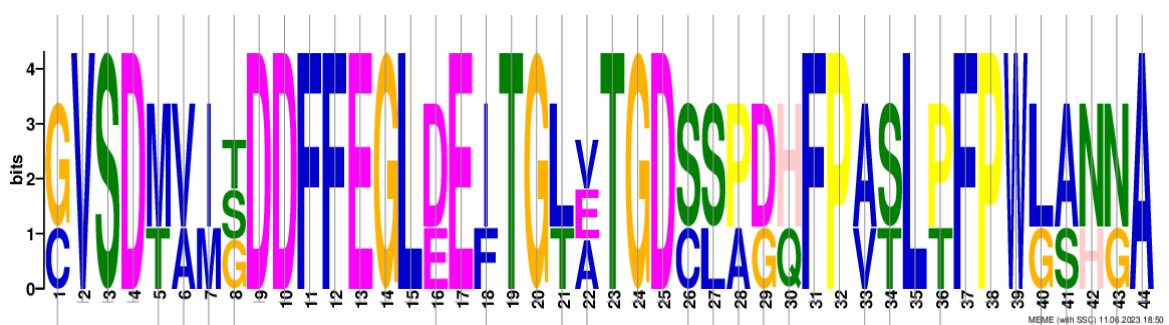

## Motif 18

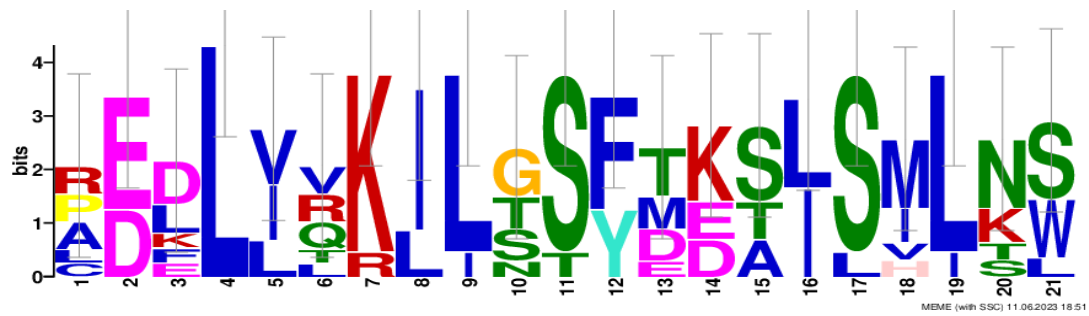

## Motif 19

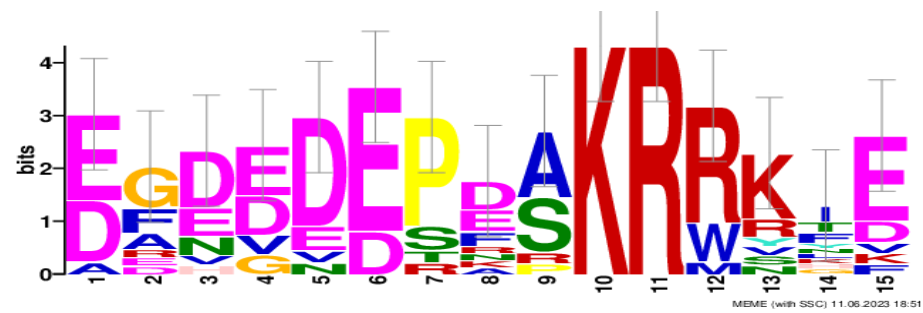

## Motif 20

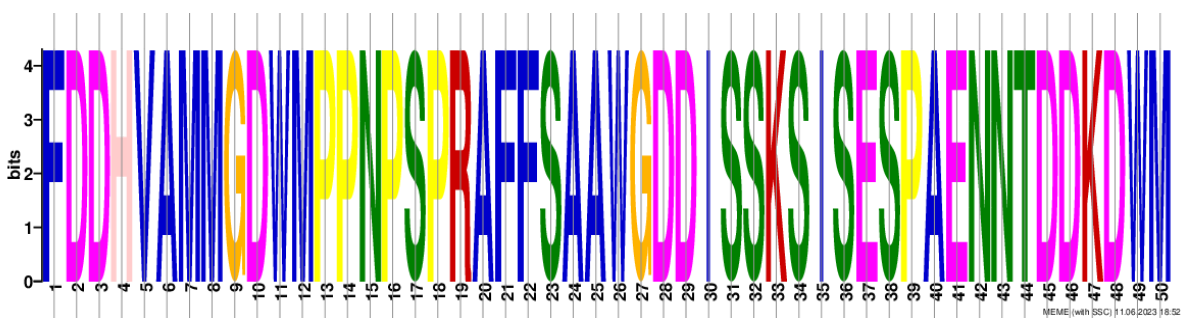

Supplement: s1 [file s1]
