# Supplementary material for: Genome-Wide Identification of Bilberry WRKY Transcription Factors: Go Wild and Duplicate
Source: MDPI journal article supplement (doi:10.3390/plants12183176), 2023-09-05
Supplement: s1 [file s1]

# Genome-Wide Expression of WRKY Transcription Factors in Blueberry: Go Wild and Duplicate

Winder Felipez <sup>1,2,†</sup>, Jennifer Villavicencio <sup>2,3,†</sup>, Valeria Oliveira Nizolli <sup>2</sup>, Camila Pegoraro <sup>2</sup>, Luciano da Maia <sup>2</sup> and Antonio Costa de Oliveira <sup>2,\*</sup>

| Duplicate Gene Pair | Ka      | Ks      | Ka_Ks    | Duplicated Type | Time (Mya)* |
|---------------------|---------|---------|----------|-----------------|-------------|
| VmWRKY37/VmWRKY38   | NaN     | NaN     | NaN      | Tandem          | –           |
| VmWRKY40/VmWRKY41   | 2.22107 | 2.59995 | 0.854276 | Tandem          | 2.30431     |
| VmWRKY46/VmWRKY47   | NaN     | NaN     | NaN      | Tandem          | –           |
| VmWRKY48/VmWRKY49   | 3.09421 | 2.55858 | 1.20934  | Segmental       | 2.97652     |
| VmWRKY4/VmWRKY19    | NaN     | NaN     | NaN      | Segmental       | –           |
| VmWRKY65/VmWRKY24   | 4.01533 | NaN     | NAN      | Segmental       | 2.89474     |
| VmWRKY11/VmWRKY44   | NaN     | NaN     | NaN      | Segmental       | –           |
| VmWRKY14/VmWRKY32   | 3.34641 | 4.13312 | 0.809656 | Segmental       | 3.5265      |
| VmWRKY61/VmWRKY63   | 3.66742 | NaN     | NaN      | Segmental       | 2.59914     |
| VmWRKY59/VmWRKY28   | NaN     | NaN     | NaN      | Segmental       | –           |
| VmWRKY67/VmWRKY22   | 2.95632 | 2.98684 | 0.989782 | Segmental       | 2.96282     |
| VmWRKY13/VmWRKY25   | 3.09497 | NaN     | NaN      | Segmental       | 2.20679     |
| VmWRKY62/VmWRKY55   | 4.39217 | 2.23753 | 1.96295  | Segmental       | 3.91536     |
| VmWRKY2/VmWRKY16    | 2.80634 | NaN     | NaN      | Segmental       | 1.95985     |
| VmWRKY1/VmWRKY3     | NaN     | NaN     | NaN      | Segmental       | –           |
| VmWRKY58/VmWRKY29   | NaN     | NaN     | NaN      | Segmental       | –           |

\*Mya, million years ago

**Figure S6:** Ks, Ka, and Ks/Ks calculation and divergence time of duplicated bilberry VmWRKY gene pairs using the KaKs\_Calculator2.0 program, applying the Nei and Gojobori (NG) method the Nei and Gojobori (NG) method.

NaN = Not a Number (Refers to an undefined value or a result that cannot be calculated)
