# Supplementary material for: Genome-Wide Identification of Bilberry WRKY Transcription Factors: Go Wild and Duplicate
Source: MDPI journal article supplement (doi:10.3390/plants12183176), 2023-09-05
Supplement: s1 [file s1]

# Genome-Wide Expression of WRKY Transcription Factors in Blueberry: Go Wild and Duplicate

Winder Felipez <sup>1,2,†</sup>, Jennifer Villavicencio <sup>2,3,†</sup>, Valeria Oliveira Nizolli <sup>2</sup>, Camila Pegoraro <sup>2</sup>, Luciano da Maia <sup>2</sup> and Antonio Costa de Oliveira <sup>2,\*</sup>

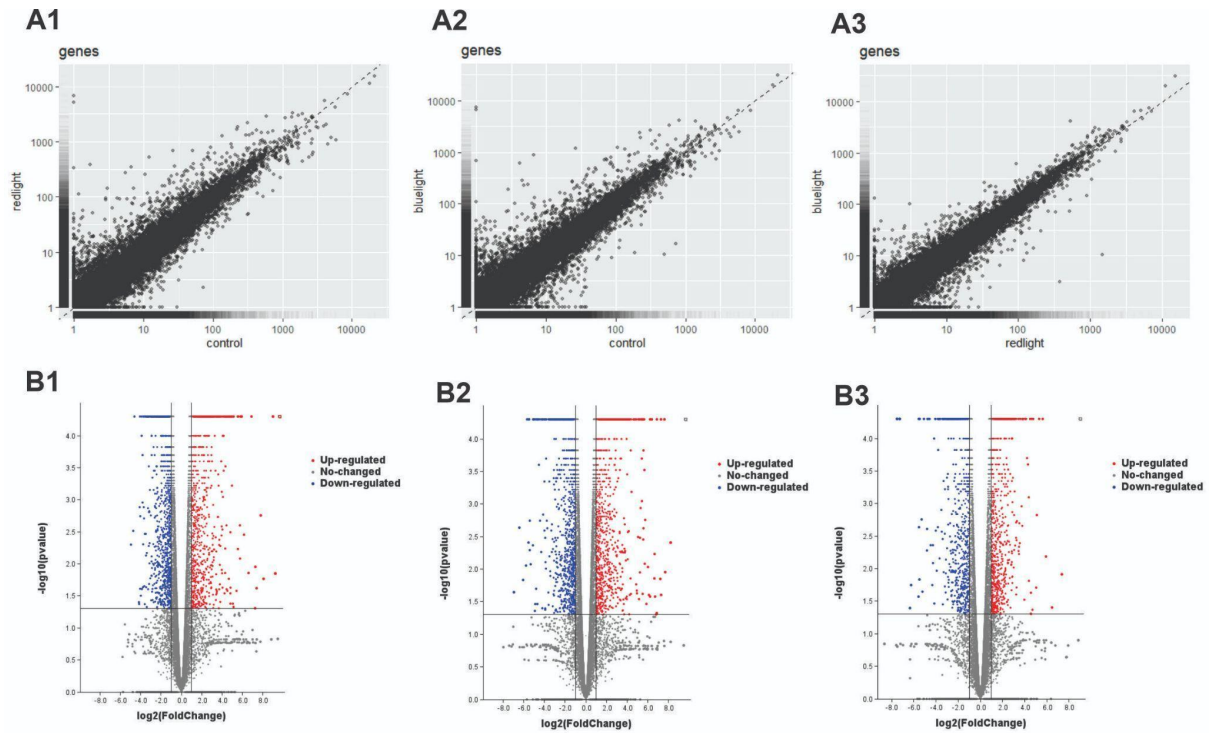

**Figure S10:** Analysis of gene expression in samples of *Vaccinium myrtillus*: A1 - A3) Volcano plots reveal genes that differ significantly between the pairs of conditions control and red light, control and blue light, red light and blue light. B1 - B3) CummeRbund scatter plots highlight general similarities and specific outliers between conditions control and red light, control and blue light, red light and blue light.
