# Supplementary material for: Genome-Wide Identification of Bilberry WRKY Transcription Factors: Go Wild and Duplicate
Source: MDPI journal article supplement (doi:10.3390/plants12183176), 2023-09-05
Supplement: s1 [file s1]

# Genome-Wide Expression of WRKY Transcription Factors in Blueberry: Go Wild and Duplicate

Winder Felipez <sup>1,2,†</sup>, Jennifer Villavicencio <sup>2,3,†</sup>, Valeria Oliveira Nizolli <sup>2</sup>, Camila Pegoraro <sup>2</sup>, Luciano da Maia <sup>2</sup> and Antonio Costa de Oliveira <sup>2,\*</sup>

**Figure S1:** Schematic representation of conserved motifs identified in bilberry VmWRKY proteins.

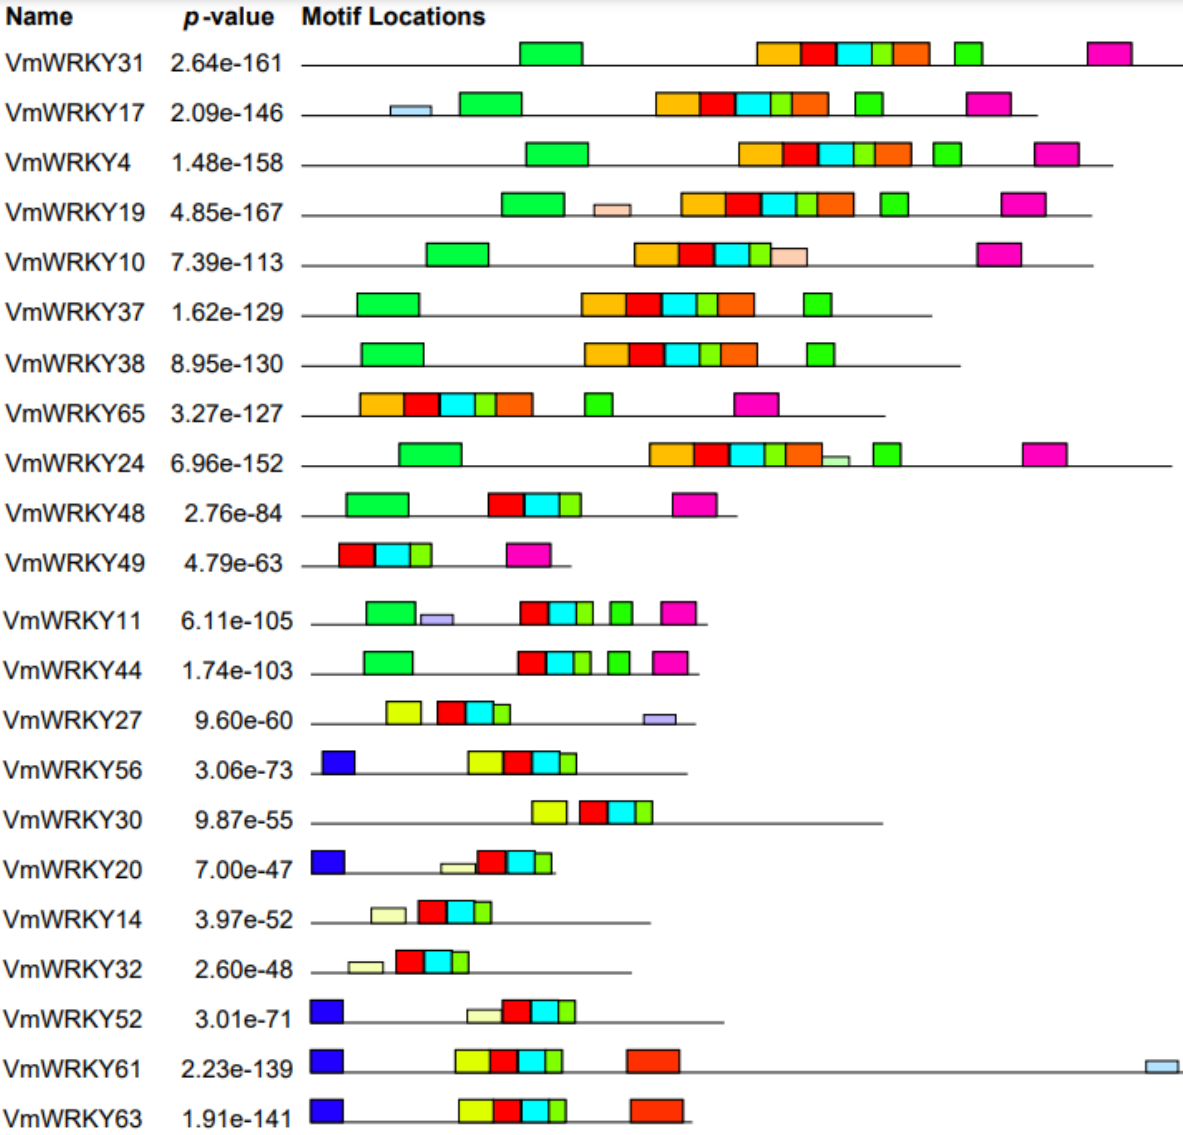

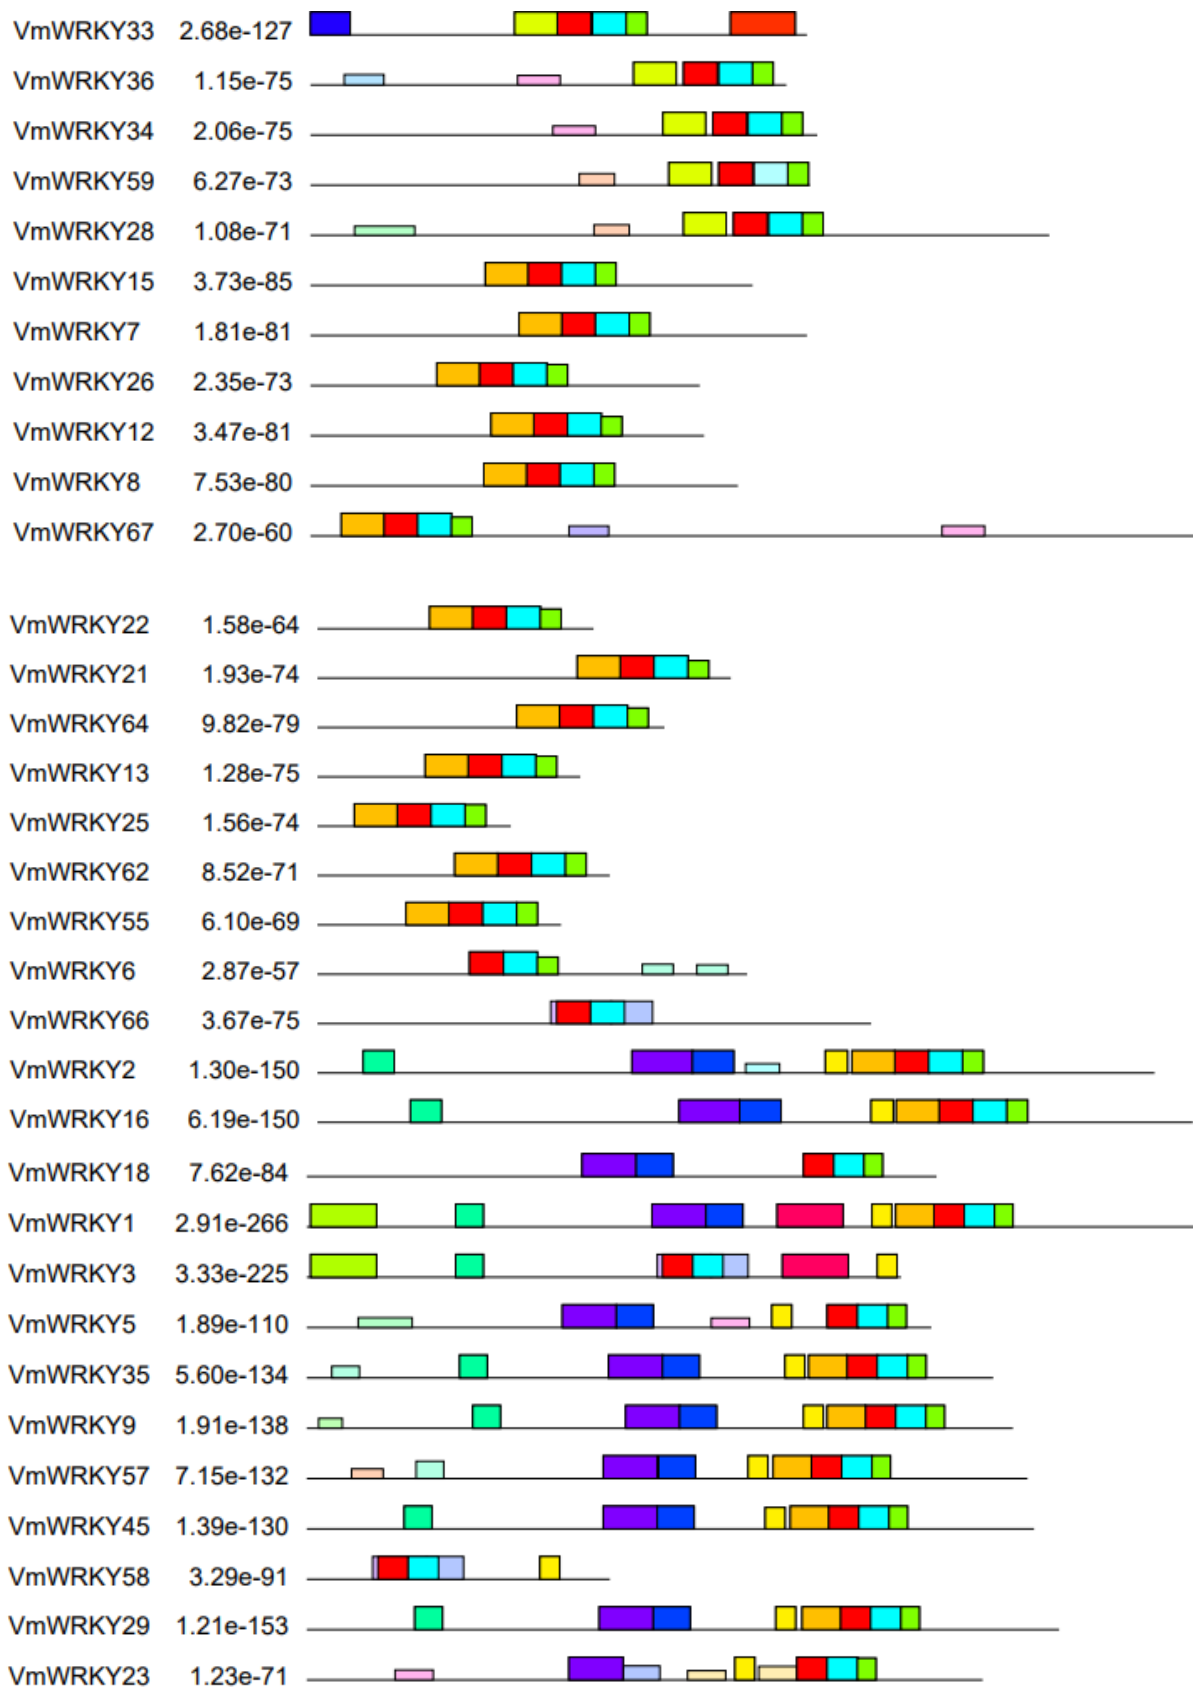

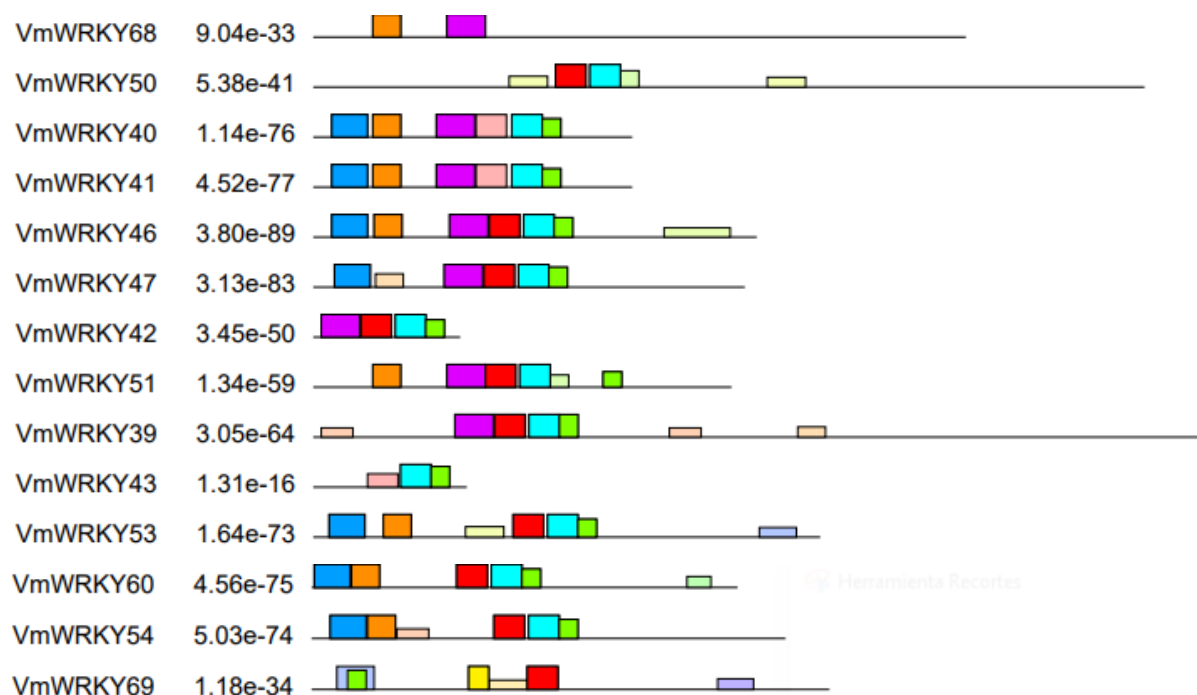

| Motif | Symbol | Motif Consensus                                   |
|-------|--------|---------------------------------------------------|
| 1.    |        | YRWRKYGQKVVGSPYPRSYRC                             |
| 2.    |        | TSPGCPVRKQVZRSEDPSMVIT                            |
| 3.    |        | TYEGEHNHPLPPAA                                    |
| 5.    |        | KDKKKGZKTVREPRVAVRTRSEVDILDDG                     |
| 7.    |        | LDGQITEIVYKGEHNHPPKQSTRSSSG                       |
| 9.    |        | TAMASTTSAAASMLLSGSSTSADG                          |
| 10.   |        | SGRCHCSKKRKSQVKRVVRVPAEGLKSAD                     |
| 11.   |        | MASISASAPFPTITLDT                                 |
| 13.   |        | NLIQELTZGFELANQLRAIJNEPFGTD                       |
| 14.   |        | MADDWDLQAVVRGCSAAASSSSATATT                       |
| 15.   |        | SAKKRRGCGYKRRRTSETRTSTTPNLIDD                     |
| 18.   |        | PEDLIVKILGSFTKSJSMLNS                             |
| 19.   |        | EGDEDEPDAKRRKIE                                   |
| 20.   |        | FDDHVAMMGDWMPNPSPRAFFSAAWGDDISSKSISESPAENNTDDKDWM |
