# Supplementary material for: Genome-Wide Identification of Bilberry WRKY Transcription Factors: Go Wild and Duplicate
Source: MDPI journal article supplement (doi:10.3390/plants12183176), 2023-09-05
Supplement: s1 [file s1]

# Genome-Wide Expression of WRKY Transcription Factors in Blueberry: Go Wild and Duplicate

Winder Felipez <sup>1,2,†</sup>, Jennifer Villavicencio <sup>2,3,†</sup>, Valeria Oliveira Nizolli <sup>2</sup>, Camila Pegoraro <sup>2</sup>, Luciano da Maia <sup>2</sup> and Antonio Costa de Oliveira <sup>2,\*</sup>

| Paralogous Pairs         | Identity               | Similarity (>70%)      | Gaps                  | Score       | Distance (in Chromosome < 100kb) | Tandem duplicates |
|--------------------------|------------------------|------------------------|-----------------------|-------------|----------------------------------|-------------------|
| VmWRKY2–VmWRKY3          | 134/399 (33.6%)        | 178/399 (44.6%)        | 114/399 (28.6%)       | 458         | 4,421                            | N                 |
| VmWRKY26–VmWRKY27        | 58/190 (30.5%)         | 95/190 (50.0%)         | 13/190 ( 6.8%)        | 228,5       | 102,076                          | N                 |
| <b>VmWRKY37–VmWRKY38</b> | <b>349/417 (83.7%)</b> | <b>368/417 (88.2%)</b> | <b>4/417 ( 1.0%)</b>  | <b>1770</b> | <b>23,629</b>                    | <b>Y</b>          |
| <b>VmWRKY40–VmWRKY41</b> | <b>240/241 (99.6%)</b> | <b>240/241 (99.6%)</b> | <b>0/241 ( 0.0%)</b>  | <b>1276</b> | <b>37,603</b>                    | <b>Y</b>          |
| VmWRKY40–VmWRKY42        | 43/86 (50.0%)          | 58/86 (67.4%)          | 5/86 ( 5.8%)          | 235,5       | 64,764                           | N                 |
| VmWRKY40–VmWRKY43        | 34/100 (34.0%)         | 46/100 (46.0%)         | 22/100 (22.0%)        | 152         | 68,637                           | N                 |
| VmWRKY41–VmWRKY42        | 43/86 (50.0%)          | 58/86 (67.4%)          | 5/86 ( 5.8%)          | 235,5       | 23,667                           | N                 |
| VmWRKY41–VmWRKY43        | 34/100 (34.0%)         | 46/100 (46.0%)         | 22/100 (22.0%)        | 152         | 27,54                            | N                 |
| VmWRKY42–VmWRKY43        | 44/87 (50.6%)          | 56/87 (64.4%)          | 12/87 (13.8%)         | 230,5       | 3,357                            | N                 |
| <b>VmWRKY46–VmWRKY47</b> | <b>209/335 (62.4%)</b> | <b>247/335 (73.7%)</b> | <b>15/335 ( 4.5%)</b> | <b>1007</b> | <b>7,765</b>                     | <b>Y</b>          |
| <b>VmWRKY48–VmWRKY49</b> | <b>129/184 (70.1%)</b> | <b>146/184 (79.3%)</b> | <b>11/184 ( 6.0%)</b> | <b>692</b>  | <b>51,301</b>                    | <b>Y</b>          |
| VmWRKY62–VmWRKY63        | 52/193 (26.9%)         | 69/193 (35.8%)         | 72/193 (37.3%)        | 188         | 57,14                            | N                 |
| VmWRKY55–VmWRKY56        | 47/141 (33.3%)         | 65/141 (46.1%)         | 27/141 (19.1%)        | 178,5       | 19,538                           | N                 |
| VmWRKY58–VmWRKY59        | 36/98 (36.7%)          | 51/98 (52.0%)          | 18/98 (18.4%)         | 156         | 4,016                            | N                 |

**Figure S3:** Pairwise identities between paralogous pairs of *VmWRKY* genes - Y:yes, N: no.
