# Supplementary material for: Genome-Wide Identification of Bilberry WRKY Transcription Factors: Go Wild and Duplicate
Source: MDPI journal article supplement (doi:10.3390/plants12183176), 2023-09-05
Supplement: s1 [file s1]

# Genome-Wide Expression of WRKY Transcription Factors in Blueberry: Go Wild and Duplicate

Winder Felipez <sup>1,2,†</sup>, Jennifer Villavicencio <sup>2,3,†</sup>, Valeria Oliveira Nizolli <sup>2</sup>, Camila Pegoraro <sup>2</sup>, Luciano da Maia <sup>2</sup> and Antonio Costa de Oliveira <sup>2,\*</sup>

| Paralogous Pairs         | Identity               | Similarity (>70%)      | Gaps                  | Score         | Segmental duplicates |
|--------------------------|------------------------|------------------------|-----------------------|---------------|----------------------|
| VmWRKY31–VmWRKY17        | 254/557 (45.6%)        | 328/557 (58.9%)        | 114/557 (20.5%)       | 1064          | N                    |
| <b>VmWRKY4–VmWRKY19</b>  | <b>347/568 (61.1%)</b> | <b>400/568 (70.4%)</b> | <b>89/568 (15.7%)</b> | <b>1556,5</b> | <b>Y</b>             |
| <b>VmWRKY65–VmWRKY24</b> | <b>378/387 (97.7%)</b> | <b>379/387 (97.9%)</b> | <b>2/387 ( 0.5%)</b>  | <b>1938</b>   | <b>Y</b>             |
| <b>VmWRKY11–VmWRKY44</b> | <b>226/344 (65.7%)</b> | <b>259/344 (75.3%)</b> | <b>25/344 ( 7.3%)</b> | <b>1050</b>   | <b>Y</b>             |
| VmWRKY56–VmWRKY30        | 114/340 (33.5%)        | 151/340 (44.4%)        | 115/340 (33.8%)       | 397           | N                    |
| <b>VmWRKY14–VmWRKY32</b> | <b>172/288 (59.7%)</b> | <b>202/288 (70.1%)</b> | <b>37/288 (12.8%)</b> | <b>813</b>    | <b>Y</b>             |
| <b>VmWRKY61–VmWRKY63</b> | <b>289/321 (90.0%)</b> | <b>298/321 (92.8%)</b> | <b>7/321 ( 2.2%)</b>  | <b>1517,5</b> | <b>Y</b>             |
| VmWRKY36–VmWRKY34        | 192/350 (54.9%)        | 244/350 (69.7%)        | 31/350 ( 8.9%)        | 904,5         | N                    |
| <b>VmWRKY59–VmWRKY28</b> | <b>258/349 (73.9%)</b> | <b>293/349 (84.0%)</b> | <b>16/349 ( 4.6%)</b> | <b>1326</b>   | <b>Y</b>             |
| VmWRKY15–VmWRKY7         | 204/331 (61.6%)        | 230/331 (69.5%)        | 60/331 (18.1%)        | 950           | N                    |
| VmWRKY12–VmWRKY8         | 106/246 (43.1%)        | 134/246 (54.5%)        | 38/246 (15.4%)        | 437,5         | N                    |
| <b>VmWRKY67–VmWRKY22</b> | <b>94/129 (72.9%)</b>  | <b>101/129 (78.3%)</b> | <b>1/129 ( 0.8%)</b>  | <b>489</b>    | <b>Y</b>             |
| VmWRKY21–VmWRKY64        | 104/234 (44.4%)        | 127/234 (54.3%)        | 34/234 (14.5%)        | 421           | N                    |
| <b>VmWRKY13–VmWRKY25</b> | <b>87/102 (85.3%)</b>  | <b>96/102 (94.1%)</b>  | <b>0/102 ( 0.0%)</b>  | <b>483</b>    | <b>Y</b>             |
| <b>VmWRKY62–VmWRKY55</b> | <b>98/164 (59.8%)</b>  | <b>116/164 (70.7%)</b> | <b>14/164 ( 8.5%)</b> | <b>491</b>    | <b>Y</b>             |
| <b>VmWRKY2–VmWRKY16</b>  | <b>378/571 (66.2%)</b> | <b>431/571 (75.5%)</b> | <b>20/571 ( 3.5%)</b> | <b>1865,5</b> | <b>Y</b>             |
| <b>VmWRKY1–VmWRKY3</b>   | <b>436/445 (98.0%)</b> | <b>437/445 (98.2%)</b> | <b>4/445 ( 0.9%)</b>  | <b>2310,5</b> | <b>Y</b>             |
| VmWRKY5–VmWRKY35         | 180/469 (38.4%)        | 238/469 (50.7%)        | 85/469 (18.1%)        | 686,5         | N                    |
| <b>VmWRKY58–VmWRKY29</b> | <b>158/183 (86.3%)</b> | <b>166/183 (90.7%)</b> | <b>10/183 ( 5.5%)</b> | <b>803</b>    | <b>Y</b>             |
| VmWRKY68–VmWRKY50        | 96/402 (23.9%)         | 140/402 (34.8%)        | 121/402 (30.1%)       | 115,5         | N                    |
| VmWRKY53–VmWRKY60        | 156/391 (39.9%)        | 206/391 (52.7%)        | 81/391 (20.7%)        | 615           | N                    |

**Figure S4:** Pairwise identities between paralogous pairs of *VmWRKY* genes - Y:yes, N: no
