# Supplementary material for: Genome-Wide Identification of Bilberry WRKY Transcription Factors: Go Wild and Duplicate
Source: MDPI journal article supplement (doi:10.3390/plants12183176), 2023-09-05
Supplement: s1 [file s1]

# Genome-Wide Expression of WRKY Transcription Factors in Blueberry: Go Wild and Duplicate

Winder Felipez <sup>1,2,†</sup>, Jennifer Villavicencio <sup>2,3,†</sup>, Valeria Oliveira Nizolli <sup>2</sup>, Camila Pegoraro <sup>2</sup>, Luciano da Maia <sup>2</sup> and Antonio Costa de Oliveira <sup>2,\*</sup>

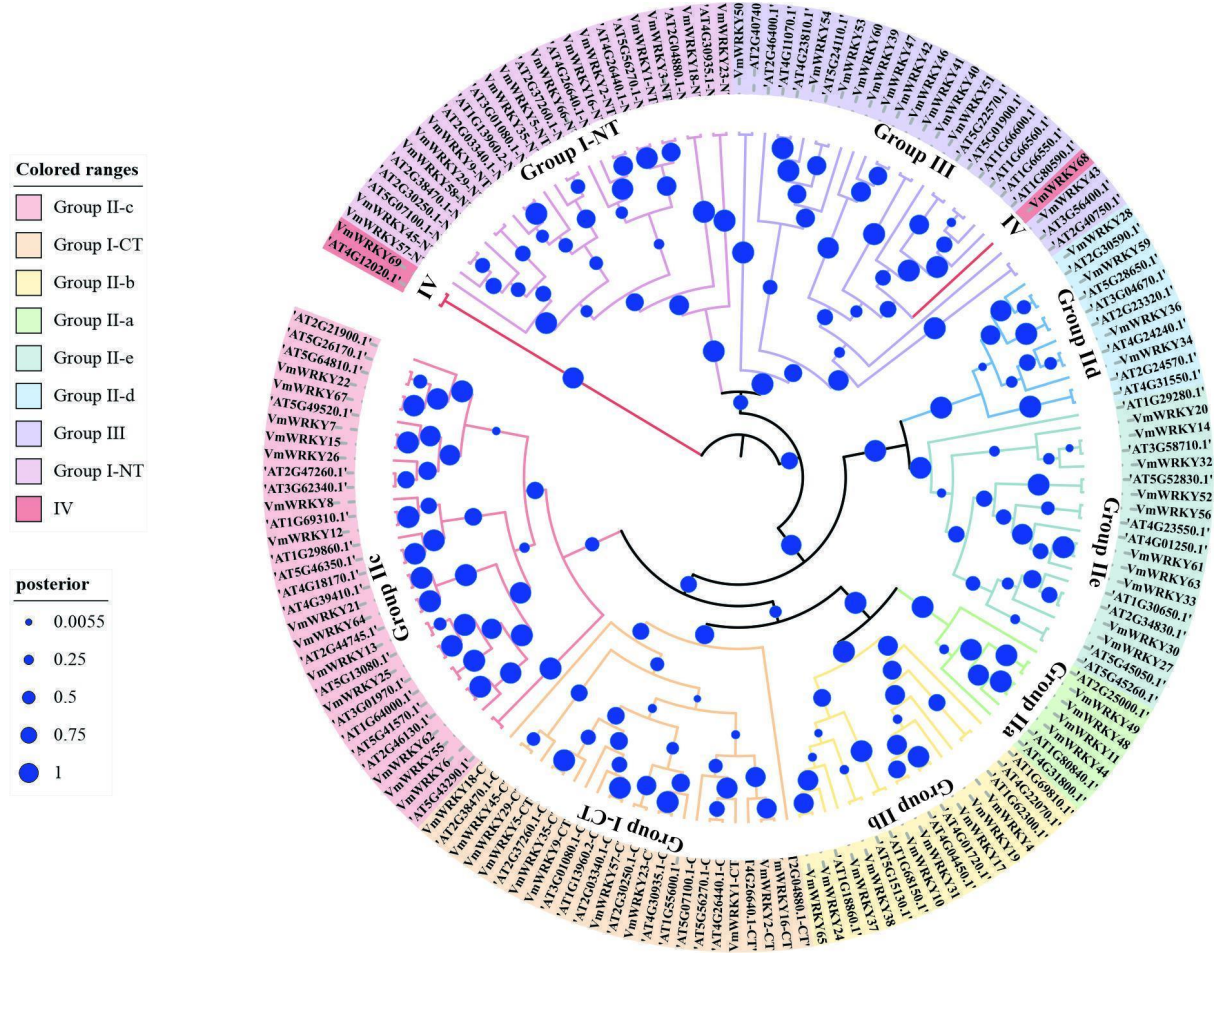

**Figure S5:** The unrooted phylogenetic tree was generated with the BEAST v.2.5 software, using the complete amino acid sequences of the 72 WRKY proteins from *Arabidopsis thaliana* genome and 69 WRKY proteins from *Vaccinium myrtillus* genome by Neighbor-Joining method, with the UPGMA clustering method and 1000 bootstrap repeats. WRKY protein subfamilies (I, IIa, IIb, IIc, IId, IIe and III).
